# Supplementary material for: Cyclic water pentamer in a tape-like structure
Source: Royal Society of Chemistry journal article supplement (doi:10.1039/b404364b), 2004-01-01
Supplement: b404364b.doc [file b404364b.doc]

**Supporting Materials**

**Experiments**

*Trans*-4,4’-azopyridine (2.4 g) was added to the solution of glacial acid (10 ml) and 30% H2O2 (5 ml). The mixture was heated at 80 C for 20 h under stirring. Upon cooling, 200 ml diethyl ether was added the resulting solution. The red precipitates were filtered out and recrystallized twice from aqueous solution. Blood red needle crystals of apdo4H2O **1** were obtained with a yield of *ca.* 64%. *Trans*-4,4’-azopyridine-dioxide (apdo) was previously prepared through reduction and diazotization from 4-nitropyridine-N-oxide and recrystallization from of a mixture of ethanol and acetone gave anhydrous *trans*-4,4’-azopyridine-dioxide.1 Compound **1** is very unstable in air and becomes opaque soon after it is taken out of solution. apdo4D2O was obtained by recrystallizing anhydrous *trans*-4,4’-azopyridine-dioxide from D2O solution.

1. E. L. Eichhorn, *Acta Crystallogr.* **1959**, *12*, 746.

**Table S1**. Hydrogen bonds parameters in compound **1**.a

D-H×××A D-H [Å] H×××A [Å] D×××A [Å] ÐD-H×××A[]

O1W-H1∙∙∙O4W 0.89(4) 1.88(4) 170(4) 2.768(3)

O1W-H2∙∙∙O3W 0.87(5) 1.99(5) 159(4) 2.814(3)

O2W-H3∙∙∙O1W 0.81(3) 1.94(3) 171(3) 2.741(3)

O2W-H4∙∙∙O3Wi 0.75(3) 2.20(3) 161(3) 2.918(3)

O3W-H5∙∙∙O2Wii 0.92(3) 1.80(3) 167(3) 2.706(3)

O3W-H6∙∙∙O2iii 0.62(4) 2.11(4) 175(5) 2.730(2)

O4W-H7∙∙∙O1iv 0.85(4) 1.93(4) 175(3) 2.776(3)

O4W-H8∙∙∙O1v 0.79(4) 1.98(4) 179(4) 2.765(2)

i -x+1/2, y, z-1/2; ii x, y, z+1; iii -x, -y+1, z+1/2, z; iv x-1/2, -y+1, z; v -x+1/2, y+1, z-1/2

a Taken from 90 K data.
